# Supplementary material for: The Link between Inequality and Population Health in Low and Middle Income Countries: Policy Myth or Social Reality?
Source: PLoS One. 2014 Dec 11;9(12):e115109. doi: 10.1371/journal.pone.0115109 (PMC4263747; doi:10.1371/journal.pone.0115109)
Supplement: S1 File — Covers the structure of the samples used in the analyses, i.e., the countries, the waves and the years of data collection. (XLSX) [file pone.0115109.s001.xlsx]

## Sheet: Women_anemia
	Wave codes	Year(s) of data collection
Albania	AL5	2008 - 2009
Armenia	AM4	2005
Azerbaijan	AZ5	2006
Bangladesh	BD6	2011
BurkinaFaso	BF4	2003
Benin	BJ5	2006
Bolivia	BO4; BO5	2003 - 2004; 2008
Burundi	BU6	2010 - 2011
CongoDemocraticRepublic	CD5	2007
Cameroon	CM4	2004
Cambodia	KH5	2005 - 2006
Egypt	EG4	2005
Ethiopia	ET4	1997
Ghana	GH4, GH5	2003; 2008
Guinea	GN4	2005
Honduras	HN5	2005 - 2006
Haiti	HT5	2005 - 2006
India	IA5	2005 - 2006
Jordan	JO5	2007 - 2009
Lesotho	LS4	2004 - 2005
Moldova	MB4	2005
Madagascar	MD4, MD5	2003 - 2004; 2008 - 2009
Mali	ML5	2006
Malawi	MW4	2004 - 2005
Niger	NI5	2006
Nepal	NP5	2006
Peru	PE5	2005 - 2008
Rwanda	RW4; RW5	2005; 2007 - 2008
SierraLeone	SL5	2008
Senegal	SN4	2005
Swaziland	SZ5	2006 - 2007
Tanzania	TZ4	2004 - 2005
Uganda	UG5	2006

## Sheet: Child_anemia
	Wave codes	Year(s) of data collection
Albania	AL5	2008 - 2009
Armenia	AM4	2005
Azerbaijan	AZ5	2006
Bangladesh	BD6	2011
BurkinaFaso	BF4	2003
Benin	BJ5	2006
Bolivia	BO4; BO5	2003 - 2004; 2008
Burundi	BU6	2010 - 2011
CongoDemocraticRepublic	CD5	2007
Cameroon	CM4	2004
Egypt	EG4	2005
Ghana	GH4, GH5	2003; 2008
Guinea	GN4	2005
Honduras	HN5	2005 - 2006
Haiti	HT5	2005 - 2006
India	IA5	2005 - 2006
Jordan	JO5	2007 - 2009
Lesotho	LS4	2004 - 2005
Moldova	MB4	2005
Madagascar	MD4	2003 - 2004
Mali	ML5	2006
Malawi	MW4	2004 - 2005
Niger	NI5	2006
Peru	PE5	2005 - 2008
Rwanda	RW4; RW5	2005; 2007 - 2008
SierraLeone	SL5	2008
Senegal	SN4	2005
Swaziland	SZ5	2006 - 2007
Tanzania	TZ4	2004 - 2005
Uganda	UG5	2006

## Sheet: Child mortality
	Wave codes	Year(s) of data collection
Albania	AL5	2008 - 2009
Armenia	AM4; AM6	2005; 2010
Azerbaijan	AZ5	2006
Bangladesh	BD4; BD5; BD6	2004; 2007; 2011
BurkinaFaso	BF4; BF6	2003; 2010
Benin	BJ5	2006
Bolivia	BO4; BO5	2003 - 2004; 2008
Burundi	BU6	2010 - 2011
CongoDemocraticRepublic	CD5	2007
Cameroon	CM4; CM6	2004; 2011
Colombia	CO4; CO5	2004 - 2005; 2010 - 2011
DominicanRepublic	DR4; DR5	2002; 2007
Egypt	EG4; EG5	2005; 2008
Ethiopia	ET4; ET6	1997; 2003
Gabon	GA3	2000
Ghana	GH4; GH5	2003; 2008
Guinea	GN4	2005
Honduras	HN5	2005 - 2006
Haiti	HT5	2005 - 2006
India	IA5	2005 - 2006
Jordan	JO5	2007 - 2009
Kenya	KE4; KE5	2003; 2008 - 2009
Cambodia	KH5	2005 - 2006
Liberia	LB5	2006 - 2007
Lesotho	LS4; LS5	2004 - 2005; 2009 - 2010
Morocco	MA4	2003 - 2004
Moldova	MB4	2005
Madagascar	MD4; MD5	2003 - 2004; 2008 - 2009
Mali	ML5	2006
Maldives	MV5	2009
Malawi	MW4; MW5	2004 - 2005; 2010
Mozambique	MZ4	2003 - 2004
Nicaragua	NC4	2001
Nigeria	NG4; NG5	2003; 2008
Namibia	NM5	2006 - 2007
Nepal	NP5; NP6	2006; 2011
Peru	PE5	2003 - 2008
Philippines	PH4; PH5	2003; 2008
Pakistan	PK5	2006 - 2007
Rwanda	RW4; RW5; RW6	2005; 2007 - 2008; 2010 - 2011
SierraLeone	SL5	2008
Senegal	SN4	2005
SaoTomeandPrincipe	ST5	2008 - 2009
Swaziland	SZ5	2006 - 2007
Chad	TD4	2004
Turkey	TR4	2003 - 2004
Tanzania	TZ4	2004 - 2005
Ukraine	UA5	2007
Uganda	UG5; UG6	2006; 2011
Vietman	VNT	2002
Zambia	ZM5	2007
Niger	NI5	2006
